# Supplementary material for: A polysaccharide fromRosa roxburghiiTratt fruit attenuates high-fat diet-induced intestinal barrier dysfunction and inflammation in mice by modulating the gut microbiota
Source: Royal Society of Chemistry journal article supplement (doi:10.1039/d1fo03190b), 2021-12-09
Supplement: d1fo03190b1.pdf [file d1fo03190b1.pdf]

## Supplementary information

### 1. Preparation of RTFP

Dried powder of *R. roxburghii* fruits was refluxed with 95% ethanol twice at 70 °C for 3 h to remove liposoluble compounds and impurities. The dried residue was extracted with distilled water with a liquid-to solid ratio of 30:1 (w/w) at 95 °C for 3 h. After extraction twice, the combined extracts were concentrated, which was then subjected to deproteinization and decolorization according to the previous methods. Then, the resulting solution was precipitated (12 h, 4 °C) by adding dehydrated ethanol to a final concentration of 80% (v/v). The precipitate was centrifuged, collected and lyophilized to obtain crude polysaccharides (RTFP). The chemical components and monosaccharide composition of RTFP are listed in [Table S1](#) and [Fig. S1](#).

Table S1 Chemical compositions of RTFP

| Chemical composition (% , g/g)      | RTFP         |
|-------------------------------------|--------------|
| Carbohydrates                       | 63.79 ± 0.73 |
| Proteins                            | 4.10 ± 0.58  |
| Uronic acids                        | 14.78 ± 0.06 |
| Moisture                            | 11.10 ± 0.25 |
| Monosaccharide composition (molar%) |              |
| Arabinose                           | 33.8 ± 1.03  |
| Galactose                           | 37.3 ± 1.65  |
| Glucose                             | 20.7 ± 0.84  |
| Mannose                             | 1.74 ± 0.03  |
| Xylose                              | 3.43 ± 0.06  |
| Fucose                              | 2.95 ± 0.16  |

The results are mean ± standard deviation of duplicate analysis.

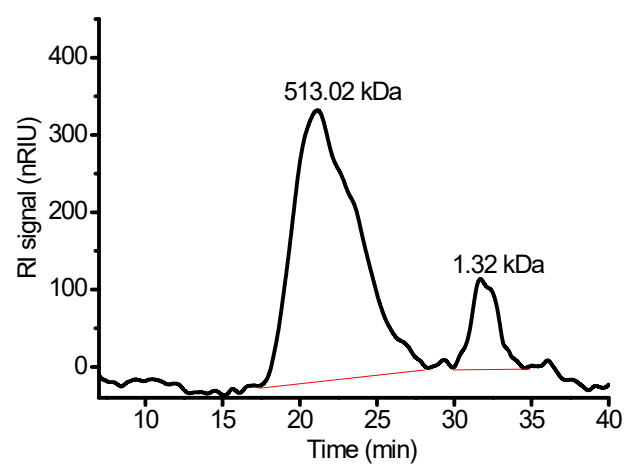

Fig.S1 The HPLC profile of molecular weight distribution of RTFP

Table S2 Feed formulation

| Product code               | HF60              |                       | LF10C             |                       |
|----------------------------|-------------------|-----------------------|-------------------|-----------------------|
|                            | gm%               | kcal%                 | gm%               | kcal%                 |
| Protein                    | 26                | 20                    | 19.2              | 20                    |
| Carbohydrate               | 26                | 20                    | 67.3              | 70                    |
| Fat                        | 35                | 20                    | 4.3               | 10                    |
| <b>kcal/gm</b>             | <b>5.24</b>       |                       | <b>3.85</b>       |                       |
| <b>7% Saccharose</b>       |                   |                       |                   |                       |
|                            | <b>weight (g)</b> | <b>calorie (kcal)</b> | <b>weight (g)</b> | <b>calorie (kcal)</b> |
| Casein                     | 200               | 800                   | 200               | 800                   |
| L-Cystine                  | 3                 | 12                    | 3                 | 12                    |
| Corn starch                | 0                 | 0                     | 506.2             | 2024.8                |
| Maltodextrin               | 125               | 500                   | 125               | 500                   |
| Saccharose                 | 68.8              | 275.2                 | 68.8              | 275.2                 |
| Cellulose                  | 50                | 0                     | 50                | 0                     |
| Soybean oil                | 25                | 225                   | 25                | 225                   |
| Lard                       | 245               | 2205                  | 20                | 180                   |
| Complex mineral<br>#210088 | 10                | 0                     | 10                | 0                     |
| Calcium hydrophosphate     | 13                | 0                     | 13                | 0                     |
| Calcium carbonate          | 5.5               | 0                     | 5.5               | 0                     |
| Potassium citrate          | 16.5              | 0                     | 16.5              | 0                     |
| Decavitamin #300050        | 10                | 40                    | 10                | 40                    |
| Choline hydrotartrate      | 2                 | 0                     | 2                 | 0                     |
| Blue pigment               | 0.05              | 0                     | 0.01              | 0                     |
| Xanthein                   |                   |                       | 0.04              | 0                     |
| <b>Total</b>               | <b>773.85</b>     | <b>4057.2</b>         | <b>1055.05</b>    | <b>4057</b>           |

Table S3 Antibodies of target proteins

| Atibody   | Cat. # | Company  | Origin             |
|-----------|--------|----------|--------------------|
| ZO-1      | AF5145 | Affinity | Pottstown, PA, USA |
| Occludin  | AF4605 | Affinity | Pottstown, PA, USA |
| Claudin-1 | DF6919 | Affinity | Pottstown, PA, USA |
| TLR4      | AF7017 | Affinity | Pottstown, PA, USA |
| NF-kB p65 | AF5006 | Affinity | Pottstown, PA, USA |
| GAPDH     | T004   | Affinity | Pottstown, PA, USA |

Table S4 Primer Sequences of Target Genes

| Target gene | Forward primer        | Reverse primer          |
|-------------|-----------------------|-------------------------|
| ZO-1        | AGGACACCAAAGCATGTGAG  | GGCATTCTGCTGGTTACA      |
| Occludin    | ACGGACCCTGACCACTATGA  | TCAGCAGCAGCCATGTACTC    |
| Claudin-1   | GCCAACACCTTCTAGTGGGA  | CAAGGAGCACCTTATCCCCG    |
| GAPDH       | AGGTCGGTGTGAACGGATTTG | TGTAGACCATGTAGTTGAGGTCA |
